# Supplementary material for: A new target: AlkBH2 promotes bladder cancer by upregulation of inflammation
Source: Research Square preprint supplement (doi:10.21203/rs.3.rs-7087922/v1), 2025-07-16
Supplement: Supplementary file 1 [file 6fc45a417f109106511b2e18.docx]

Table S1

**ELISA used for cells**

| **Name** | **Company** |
| --- | --- |
| IL-1β | Proteintech, Wuhan, China |
| TNF-α | Thermo Fisher Scientific, Massachusetts, United States |
| IL-12 | Thermo Fisher Scientific, Massachusetts, United States |
| IL-17 | Thermo Fisher Scientific, Massachusetts, United States |
| IL-10 | Elabscience, Wuhan, China |
| IL-4 | Proteintech, Wuhan, Chian |
| TGF-β | Proteintech, Wuhan, China |
| IL-37 | Thermo Fisher Scientific, Massachusetts, United States |

Table S2

**Sequences of AlkBH2**

| **Gene** | **Sequences** |
| --- | --- |
| AlkBH2 forward primer | 5’-TCCTCTTCCGGCACAAAGAC-3’ |
| AlkBH2 reverse primer | 5’-GGGGTGGTTCATCATCAGCA-3’ |
| AlkBH2 silencing | 5’-TGGACAGATTCCTGGTGAAAG-3’ |

Table S3

**Antibodies used for Western blotting**

| **Antibody** | **Company** | **Solution** |
| --- | --- | --- |
| AlkBH2 | Proteintech, Wuhan, China | 1:1000 |
| NRF2 | Boster, Wuhan, Chian | 1:500 |
| HO-1 | Proteintech, Wuhan, China | 1:1000 |
| P-P65 | Abcam, UK | 1:1000 |
| Actin | Servicebio, Wuhan, Chian | 1:500 |
| P56 | Abcam, UK | 1:1000 |
